# Supplementary material for: Formation, stability and hydrothermal waves in evaporating liquid lenses
Source: Royal Society of Chemistry journal article supplement (doi:10.1039/c8sm02044b), 2019-01-01

## Liquid depth = 7mm

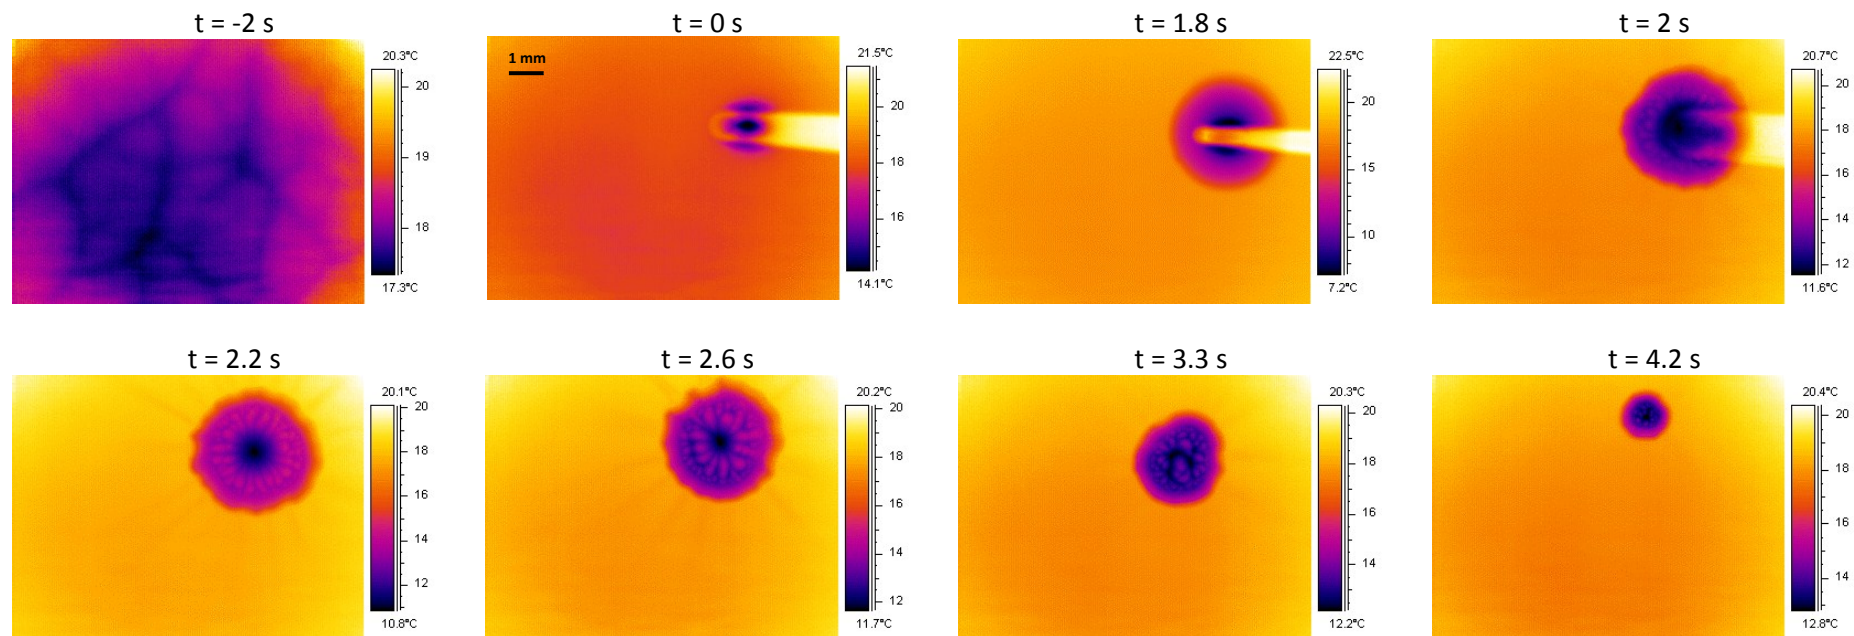

Liquid depth = 5mm (zoomed picture near lens; no temperature scale is shown)

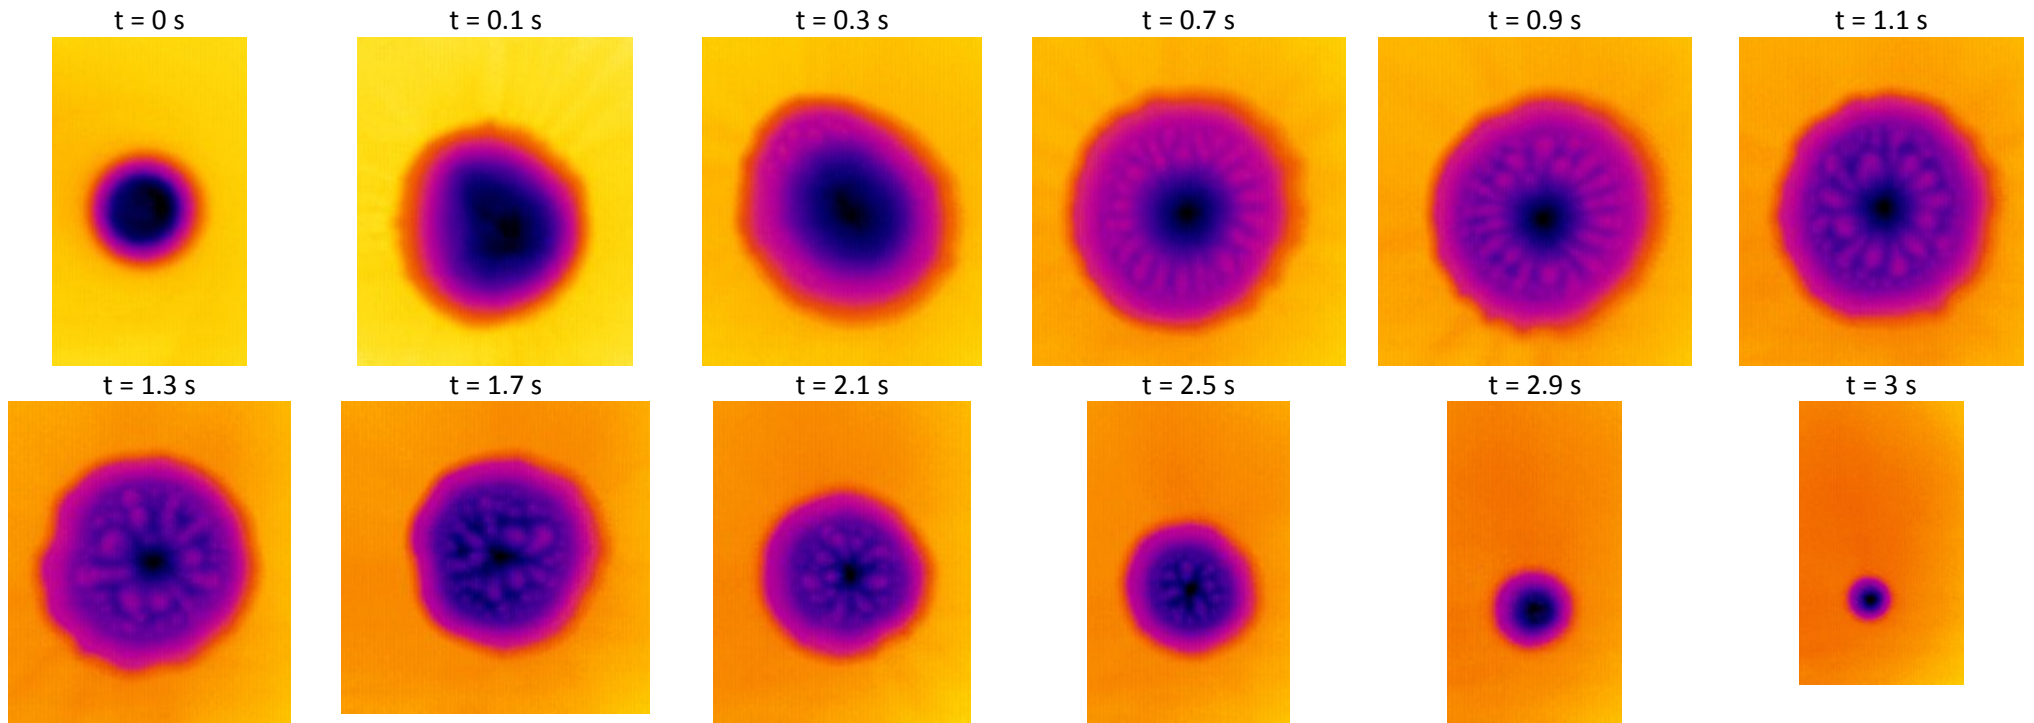

Liquid depth = 3mm (zoomed picture near lens; no temperature scale is shown)

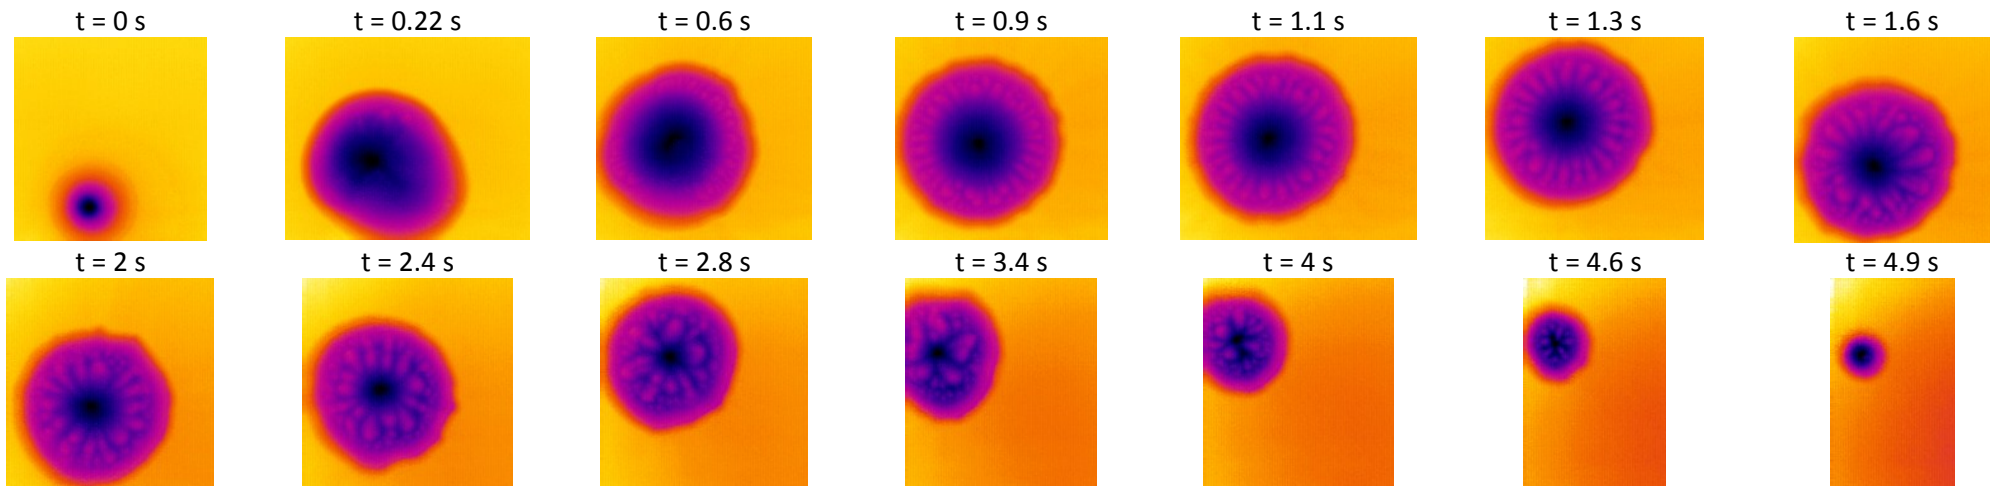

Liquid depth = 2mm (zoomed picture near lens; no temperature scale is shown)

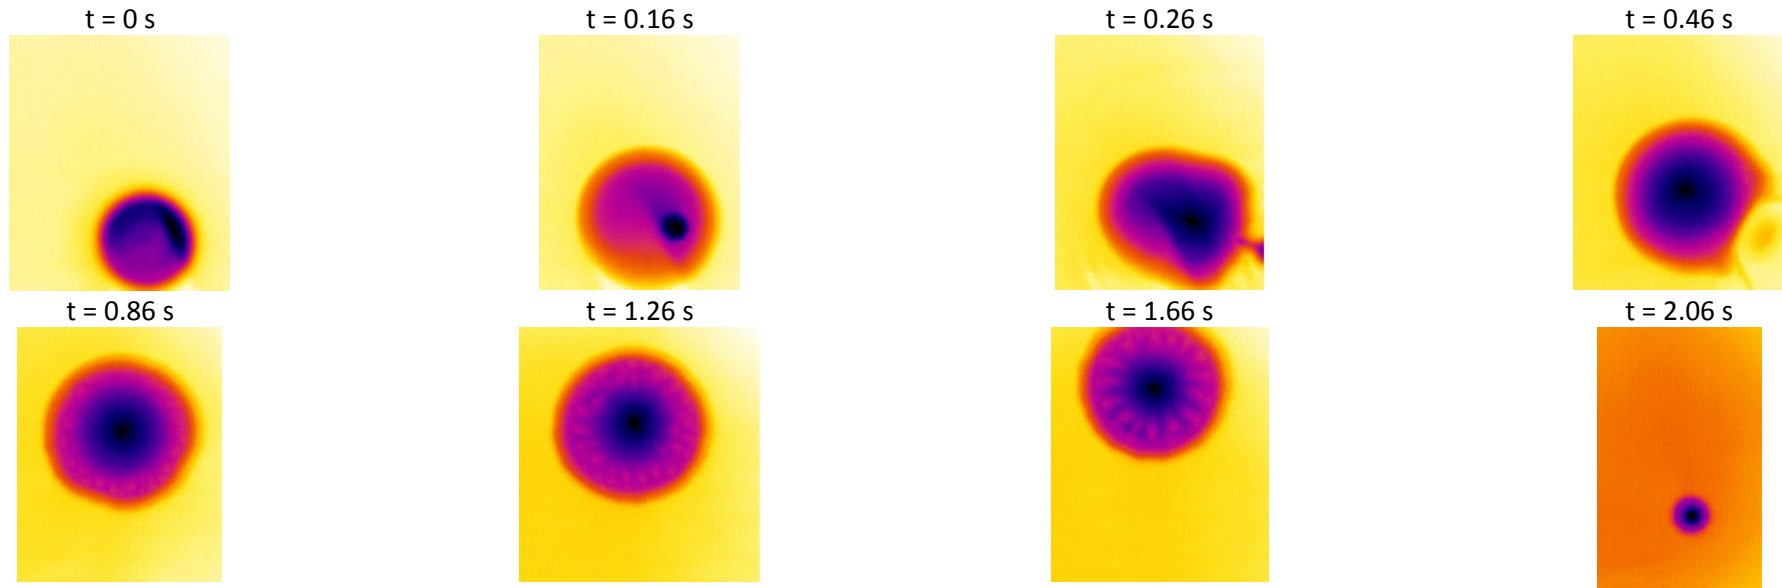

Liquid depth = 1mm (zoomed picture near lens; no temperature scale is shown)

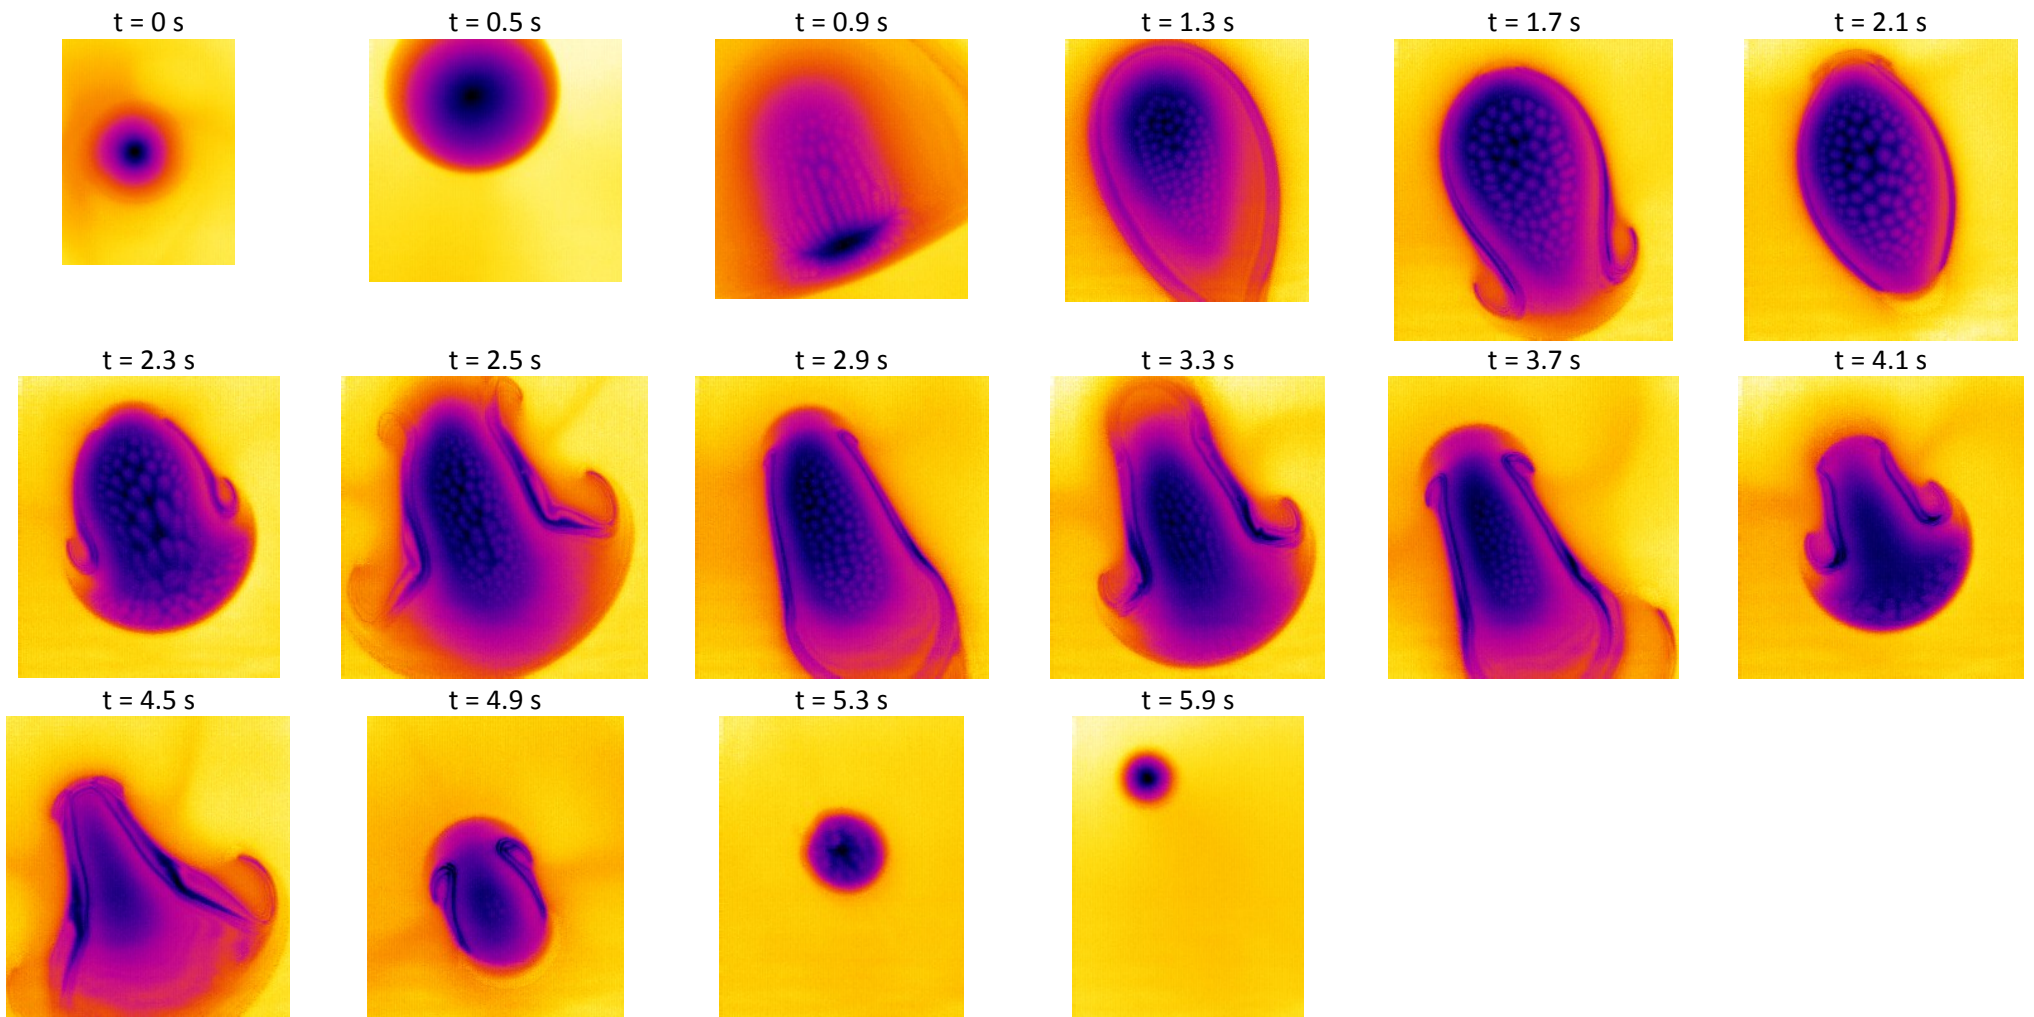

Liquid depth = 0.5mm (zoomed picture near lens; no temperature scale is shown)

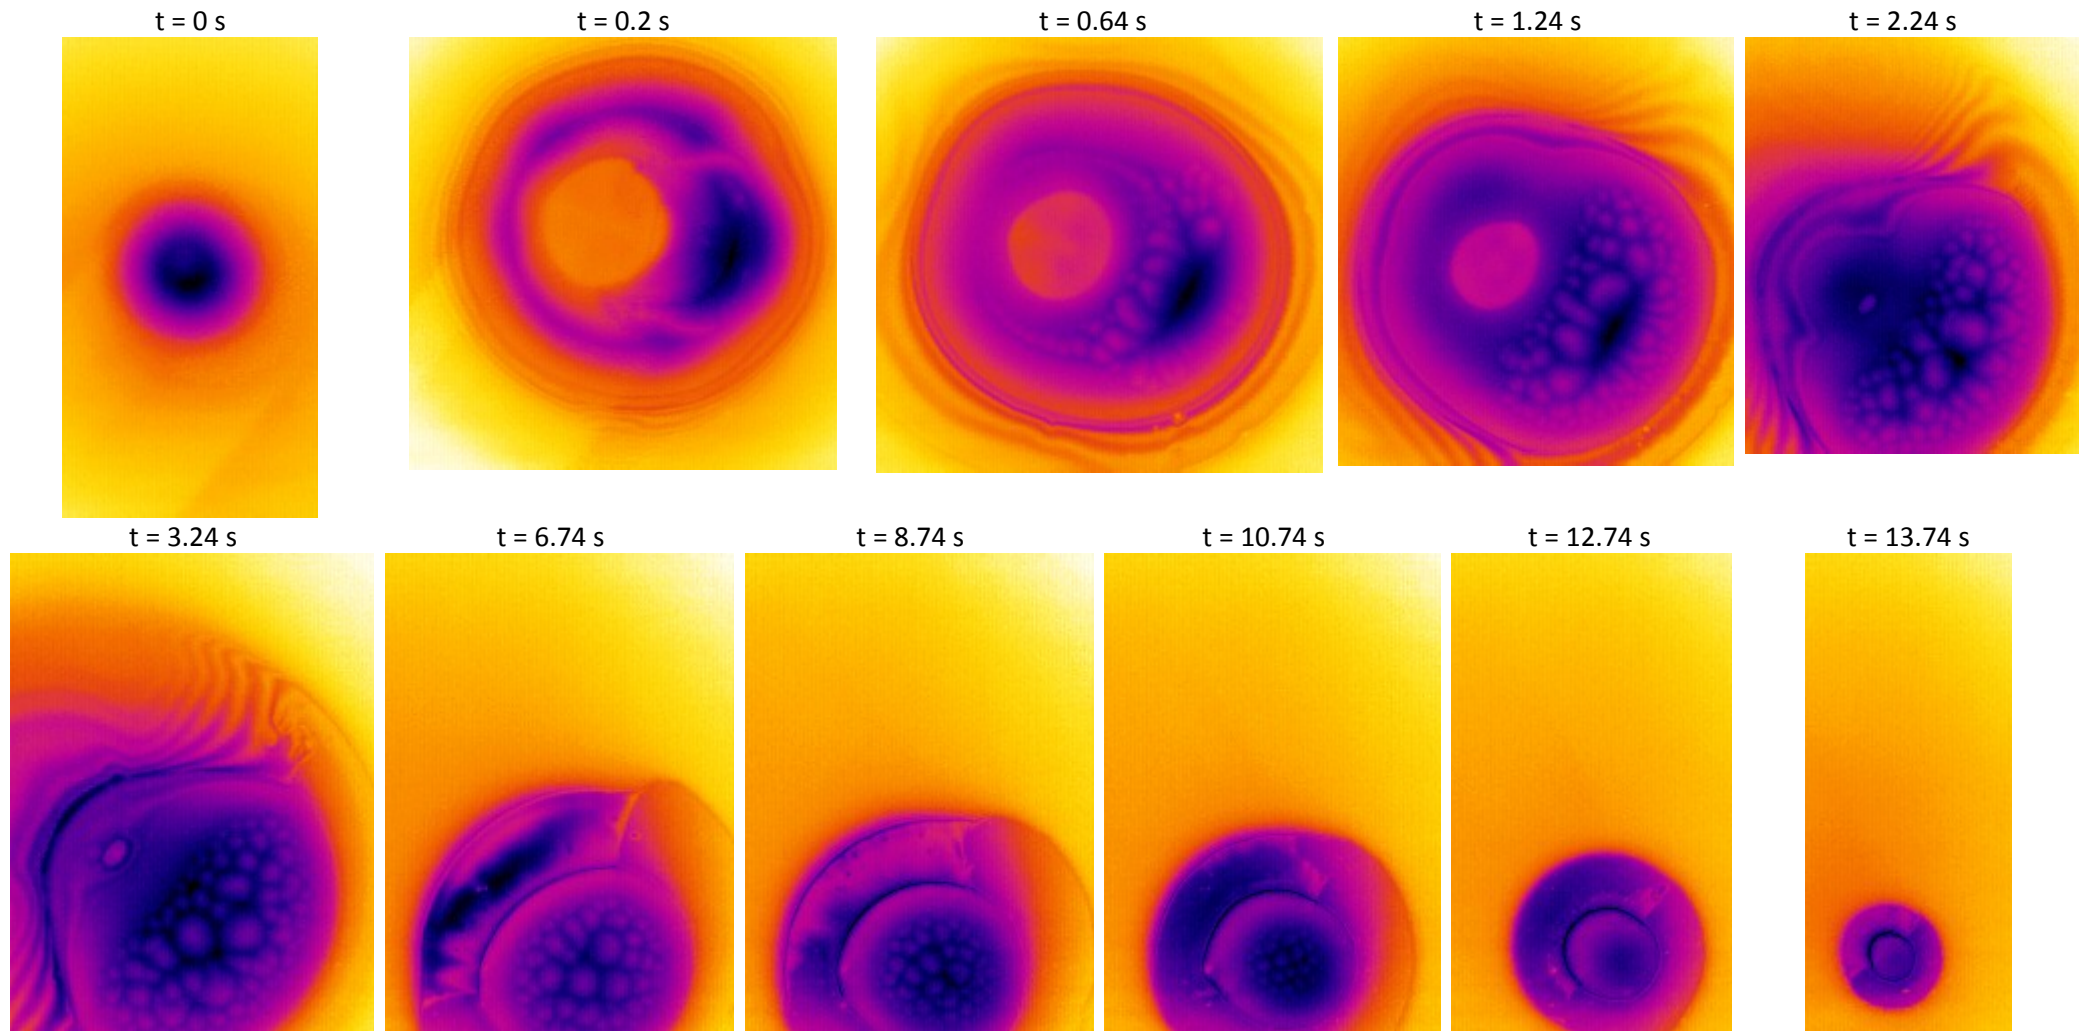

Supplement: c8sm02044b2.pdf [file c8sm02044b2.pdf]
