# Supplementary material for: Formation, stability and hydrothermal waves in evaporating liquid lenses
Source: Royal Society of Chemistry journal article supplement (doi:10.1039/c8sm02044b), 2019-01-01

**Liquid depth = 7mm**

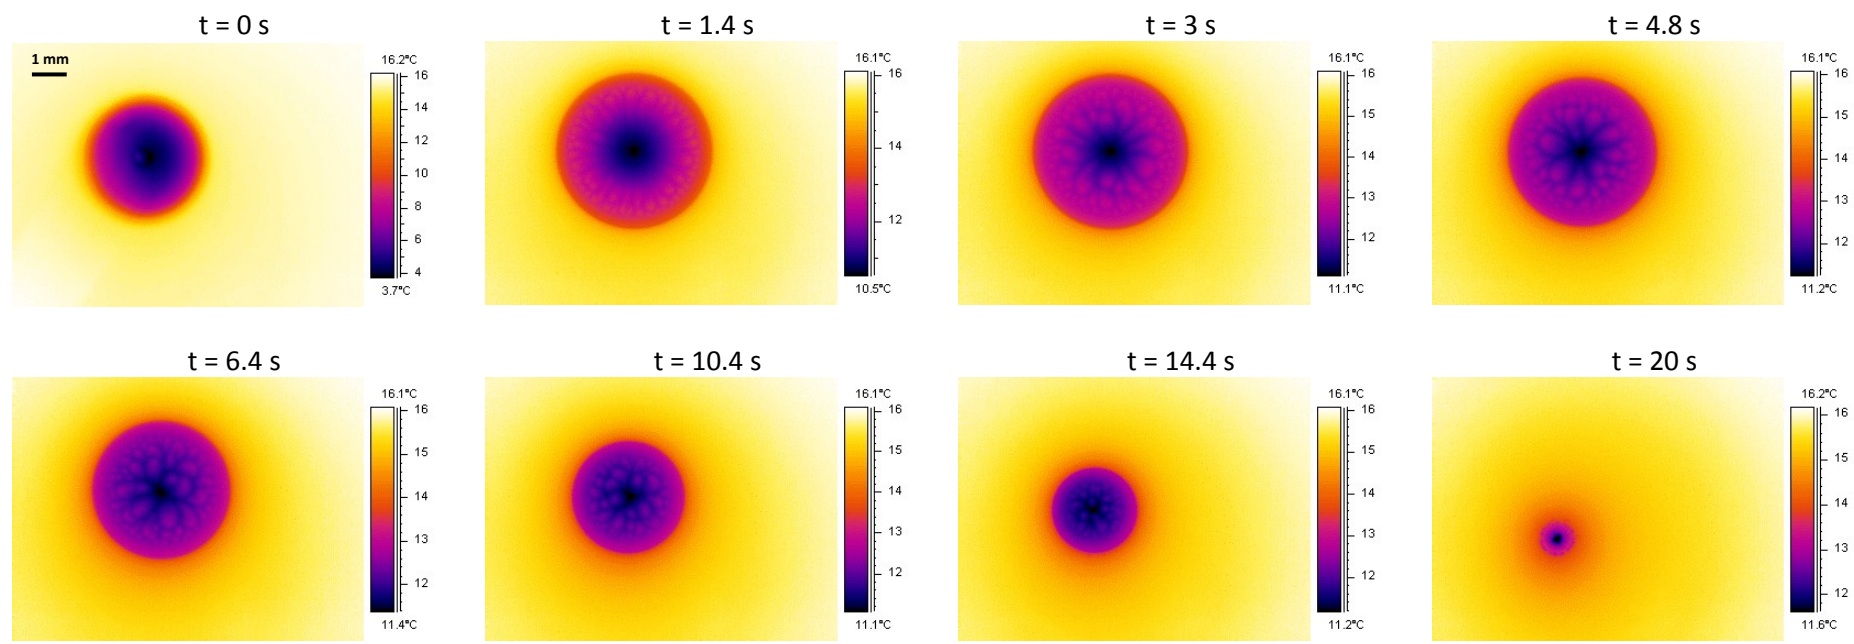

**Liquid depth = 5mm (zoomed picture near lens; no temperature scale is shown)**

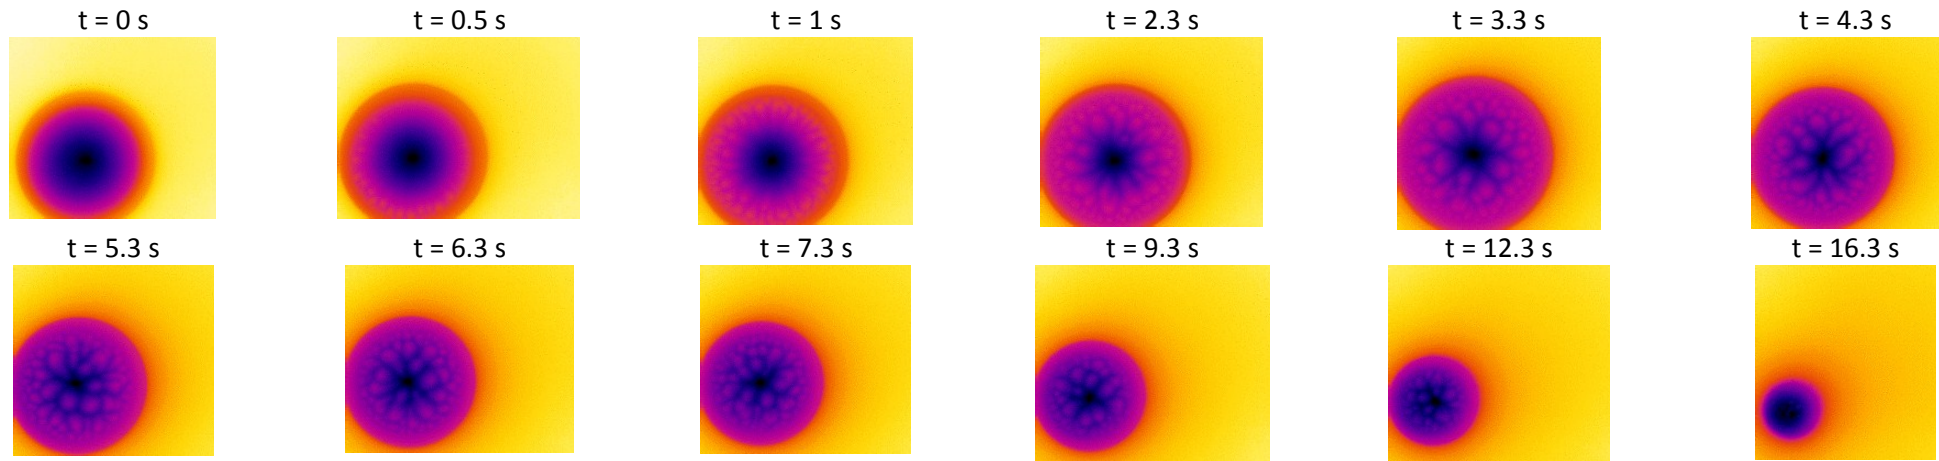

**Liquid depth = 3mm (zoomed picture near lens; no temperature scale is shown)**

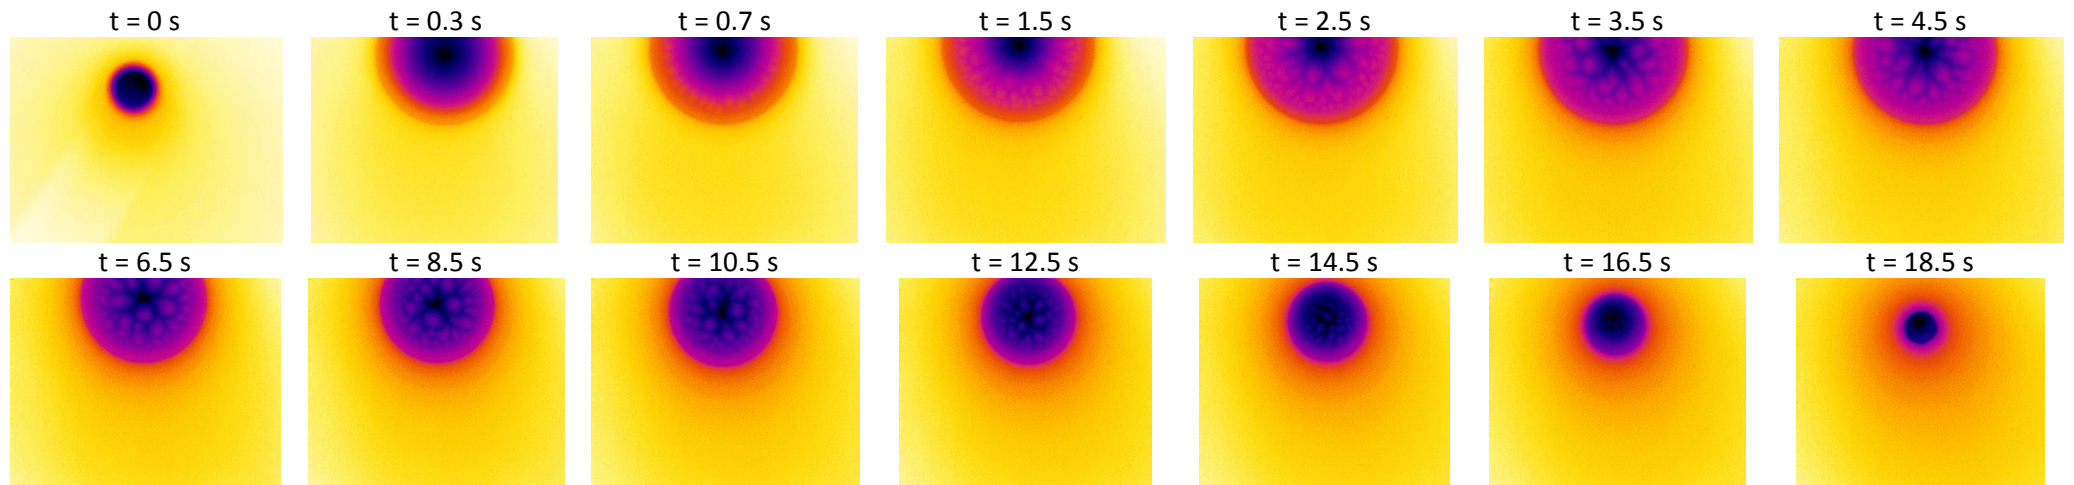

Liquid depth = 2mm (zoomed picture near lens; no temperature scale is shown)

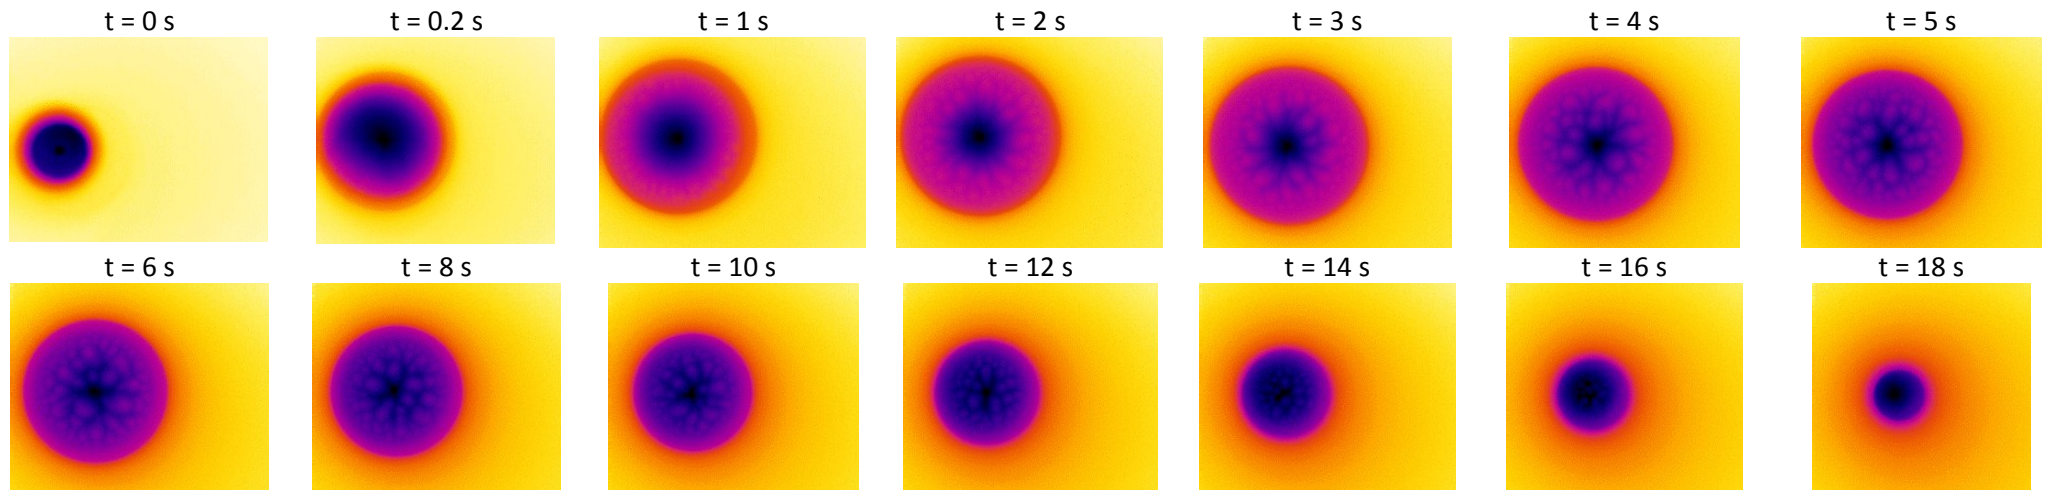



**Liquid depth = 1mm (zoomed picture near lens; no temperature scale is shown)**

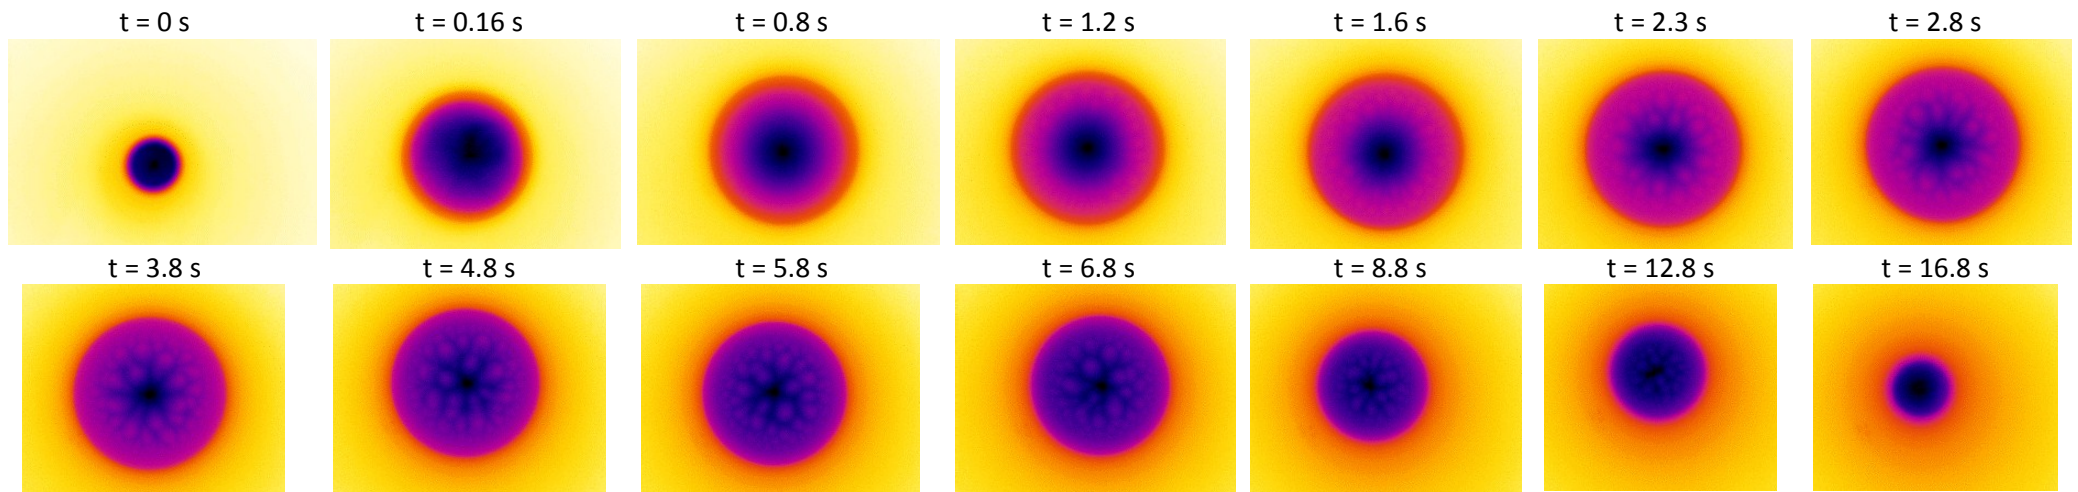

Supplement: c8sm02044b3.pdf [file c8sm02044b3.pdf]
